# Supplementary material for: Dual RNA-seq identifies human mucosal immunity protein Mucin-13 as a hallmark of Plasmodium exoerythrocytic infection
Source: PubMed Central journal article supplement (PMC6353872; doi:10.1038/s41467-019-08349-0), 2019-01-30
Supplement: 41467_2019_8349_MOESM1_ESM.pdf [file 41467_2019_8349_MOESM1_ESM.pdf]

# Supplemental Information for

## Dual RNA-seq identifies human mucosal immunity protein Mucin-13 as a hallmark of *Plasmodium* exoerythrocytic infection

Authors: Gregory M. LaMonte<sup>1\*</sup>, Pamela Orjuela-Sanchez<sup>1\*</sup>, Jaeson Calla<sup>1</sup>, Lawrence Wang<sup>1</sup>, Shangzhong Li<sup>1,2,3</sup>, Justine Swann<sup>1</sup>, Annie N. Cowell<sup>4</sup>, Bing Yu Zou<sup>1</sup>, Alyaa M. Abdel-Haleem Mohamed<sup>5</sup>, Zaira Villa-Galarce<sup>6</sup>, Marta Moreno<sup>6,7</sup>, Carlos Tong-Rios<sup>6</sup>, Joseph M. Vinetz<sup>4,6,8</sup>, Nathan Lewis<sup>1,2,3</sup> and Elizabeth A. Winzeler<sup>1</sup>

**Affiliations:** <sup>1</sup>Department of Pediatrics, University of California, San Diego, School of Medicine, La Jolla, CA 92093, United States

<sup>2</sup>Novo Nordisk Foundation Center for Biosustainability at the University of California, San Diego, La Jolla, CA 92093, United States

<sup>3</sup>Department of Bioengineering, University of California, San Diego, La Jolla, CA 92093, United States

<sup>4</sup>Division of Infectious Diseases, Department of Medicine, University of California San Diego, La Jolla, CA 92093, United States

<sup>5</sup>Computational Bioscience Research Centre (CBRC) and Biological and Environmental Sciences and Engineering (BESE) division, King Abdullah University of Science and Technology (KAUST), Thuwal, 23955-6900, Saudi Arabia

<sup>6</sup>Laboratorio ICEMR-Amazonia, Laboratorio de Investigación y Desarrollo, Facultad de Ciencias y Filosofía, Universidad Peruana Cayetano Heredia, Lima, Peru

<sup>7</sup> Current Address: London School of Hygiene and Tropical Medicine, Department of Immunology and Infection, London, UK

<sup>8</sup> Current Address: Yale School of Medicine, Section of Infectious Diseases, Department of Internal Medicine, New Haven, CT

\* These authors contributed equally to the project

Lead Contact: Elizabeth A. Winzeler - ewinzeler@ucsd.edu

\* These authors contributed equally to this work

**Corresponding Author:** Elizabeth A. Winzeler - ewinzeler@ucsd.edu

## Supplementary Figures

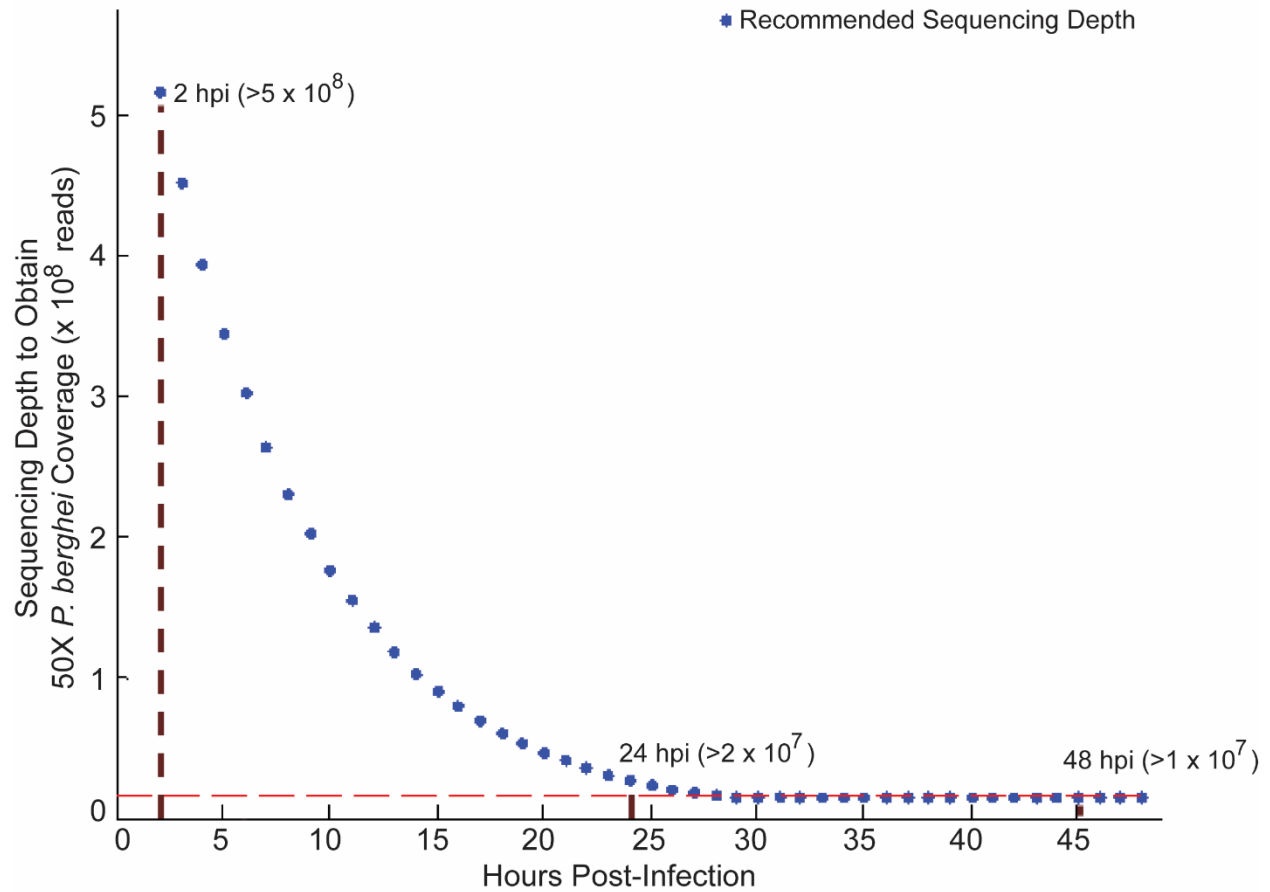

**Supplementary Figure 1: Analysis of required sequencing depth needed to ensure adequate *P. berghei* sequencing coverage.** Dashed lines indicate position of 2 hpi (dark red) and point of lowest coverage requirement (light red).

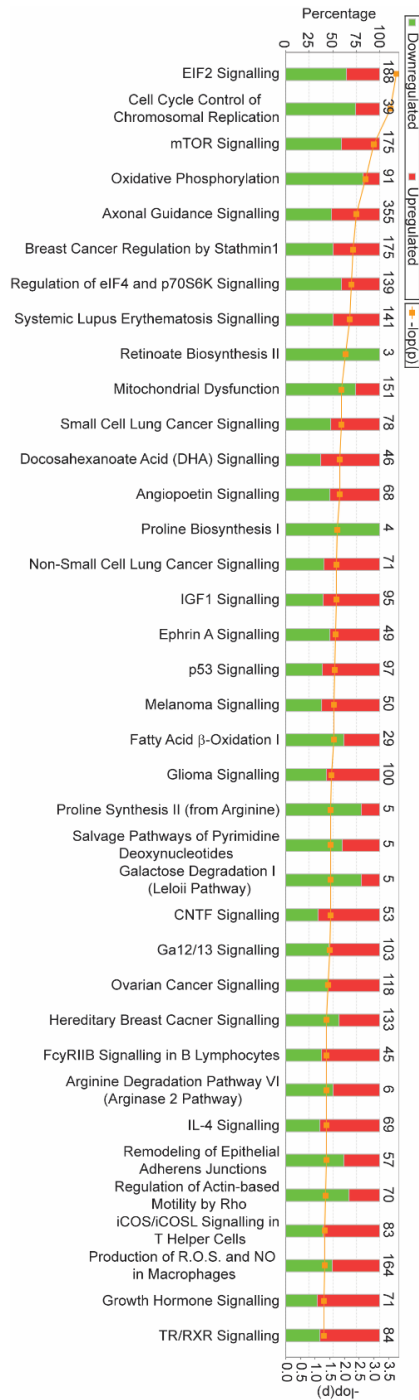

**Supplementary Figure 2: Identification of Host transcriptional pathways whose expression was altered using Ingenuity pathway analysis.** Comparison was made between all 48 hpi infected datasets (7 datasets in Total: 4 Huh7.5.1, 2 HC04 and 1 HepG2) versus the corresponding matched uninfected datasets. Pathways are indicated by percentage of dysregulated genes versus total genes in the pathway and the  $-\log P$ -value, with Red indicating upregulated genes and green representing downregulated genes within each category.

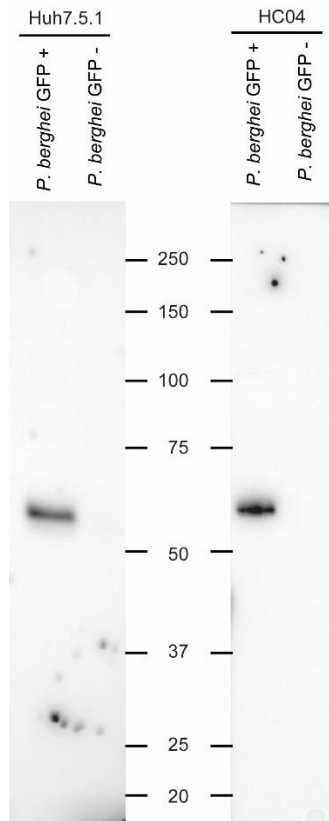

**Supplementary Figure 3: Full-length western blots of *MUC13* for the westerns shown in figure 1D.** Molecular weights, in kDa, are indicated. A 1:500 dilution of rabbit polyclonal antibody to the MUC13 intracellular domain (MUC13 Antibody #2: LifeSpan BioSciences #C345092) was used to label the protein, and the presence of MUC13 was identified using a 1:5,000 dilution of goat anti-rabbit secondary conjugated with HRP.

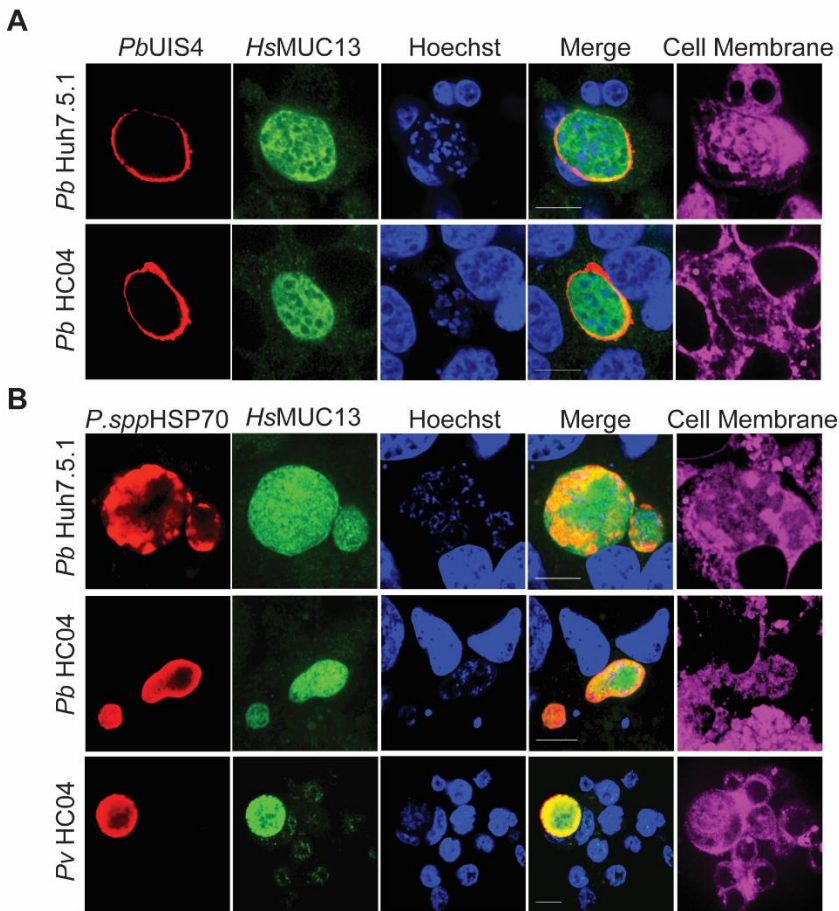

**Supplementary Figure 4: Expression and localization of *MUC13* in *Plasmodium* hepatoma cells.** (A, B) Confocal microscopy images of Huh7.5.1 and HC04 liver cells infected with *Plasmodium* parasites 48 hpi. Cells were labeled using a rabbit polyclonal antibody (dilution 1:500, 1 mg/ml stock) against the intracellular region of MUC13 (MUC13 Antibody #2 - LifeSpan BioSciences #LS-C345092) and visualized with a goat anti-rabbit Alexa Fluor 488 (green); Nuclei were labeled with Hoechst 33342 (blue); CellMask deep red was used to identify hepatocyte plasma membranes (magenta). *P. berghei* (A, B) and *P. vivax* (B) EEFs were labeled using a goat polyclonal (dilution 1:200, 1 mg/ml stock) against *Pb*UIS4 (Biorbyt #orb11636) (A) or a mouse polyclonal (dilution 1:500, 1 mg/ml stock) *P.spp*HSP70 (B) antibodies and visualized with a bovine or a goat anti-goat or anti-mouse secondary antibody (Alexa Fluor 647, red), respectively. Merged images between HsMUC13, UIS4 or *P.spp*HSP70 and Hoechst are shown. Scale bars 10  $\mu$ m; 100X oil objective.

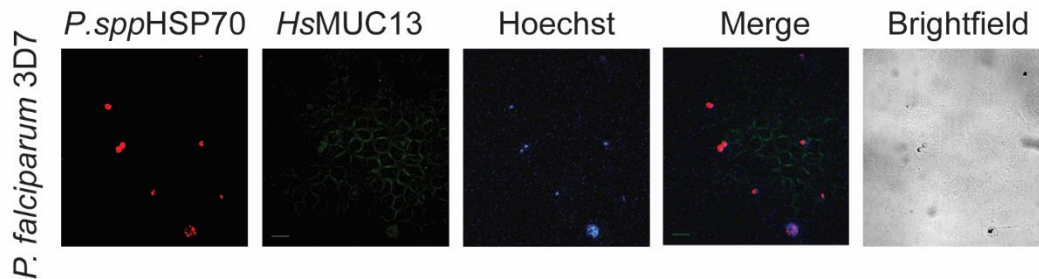

**Supplementary Figure 5: Staining of *MUC13* in *P. falciparum* asexual blood stages.**

Thin smears of asynchronous *P. falciparum* 3D7 culture were fixed in cold methanol for 5 minutes and washed twice in cold PBS. Slides were stained overnight with a 1:700 dilution (1 mg/ml stock) of mouse polyclonal antibody to *P.sppHSP70* and a 1:500 dilution of rabbit polyclonal antibody to *HsMUC13* extracellular domain (*MUC13* Antibody #2 - LifeSpan BioSciences #LS-C345092). Primary antibody localization was visualized with goat anti-mouse (Alexa Fluor 647, red) and goat anti-rabbit (Alexa Fluor 488, green) secondary antibodies, respectively. Nuclei were stained with Hoechst 33342 (blue). Merged images between *HsMUC13*, *P.sppHSP70*, and Hoechst and unstained Brightfield merged with Hoechst 33342 are shown. Scale bars 10  $\mu$ m; 60X oil objective.

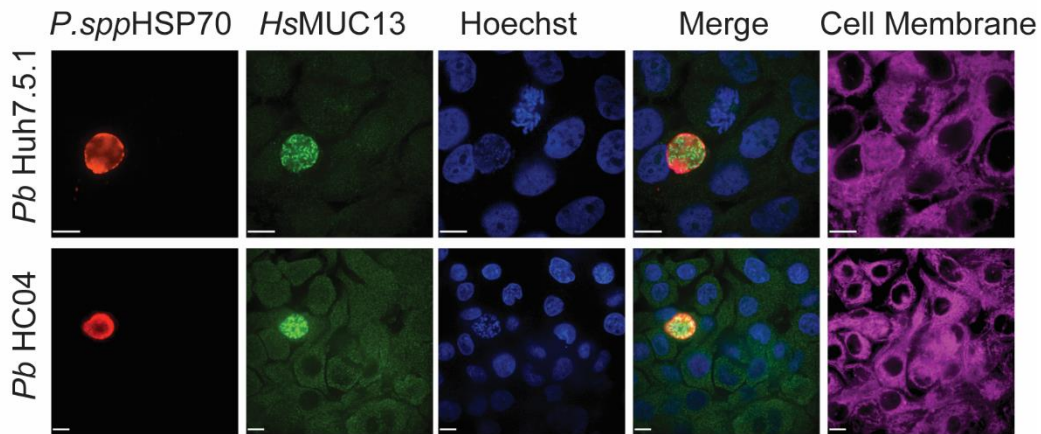

**Supplementary Figure 6: Detection of *MUC13* in *P. berghei*-infected HC04 cells at 48 hpi using immunofluorescence microscopy and an alternative *HsMUC13* antibody.** Cells were fixed and stained with a 1:500 dilution (1 mg/ml stock) of mouse polyclonal antibody to *P.spp*HSP70 (see methods) and a 1:500 dilution of rabbit polyclonal antibody to MUC13 extracellular domain (MUC13 Antibody #3 - LifeSpan BioSciences #LS-A8191). Primary antibody localization was visualized with goat anti-mouse (Alexa Fluor 647, red) and goat anti-rabbit (Alexa Fluor 488, green) secondary antibodies, respectively. Nuclei were stained with Hoechst 33342 (blue) and host cell membranes with CellMask deep red (magenta). Scale bars 10  $\mu$ m; 60X oil objective.

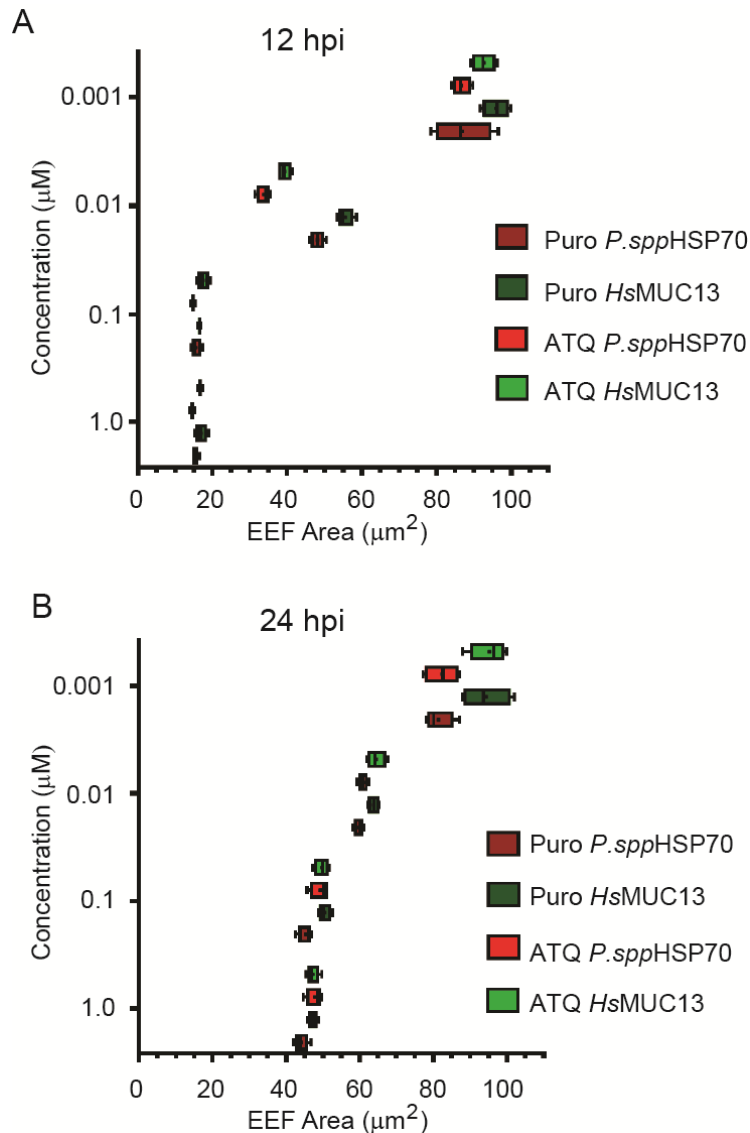

**Supplementary Figure 7: MUC13 as a biomarker for *Plasmodium* EEf detection.**

Effect of atovaquone (ATQ) and puromycin (PURO) on growth (cell area) of *P. berghei* EEf when treated at two different time points: 12 hpi (A) and 24 hpi (B). The assay was incubated for 48 hpi total. Dashed line represents DMSO control. Data (n=2) presented with the mean indicated by a “+” and error bars indicating the 5-95% confidence interval. *P. berghei* was labeled with a *P.spp*HSP70 mouse polyclonal antibody (dilution 1:500, 1 mg/ml stock) and visualized with goat anti-mouse antibody (Alexa Fluor 647, red). Cells were labeled with a rabbit polyclonal antibody recognizing the intracellular domain of MUC13 (MUC13 antibody #2-LifeSpan BioSciences #C345092) (1:500 dilution, 1 mg/ml stock) and detected with a goat anti-rabbit antibody (Alexa Fluor 488, green). Hoechst 33342 was used for cell and parasite nuclei identification.



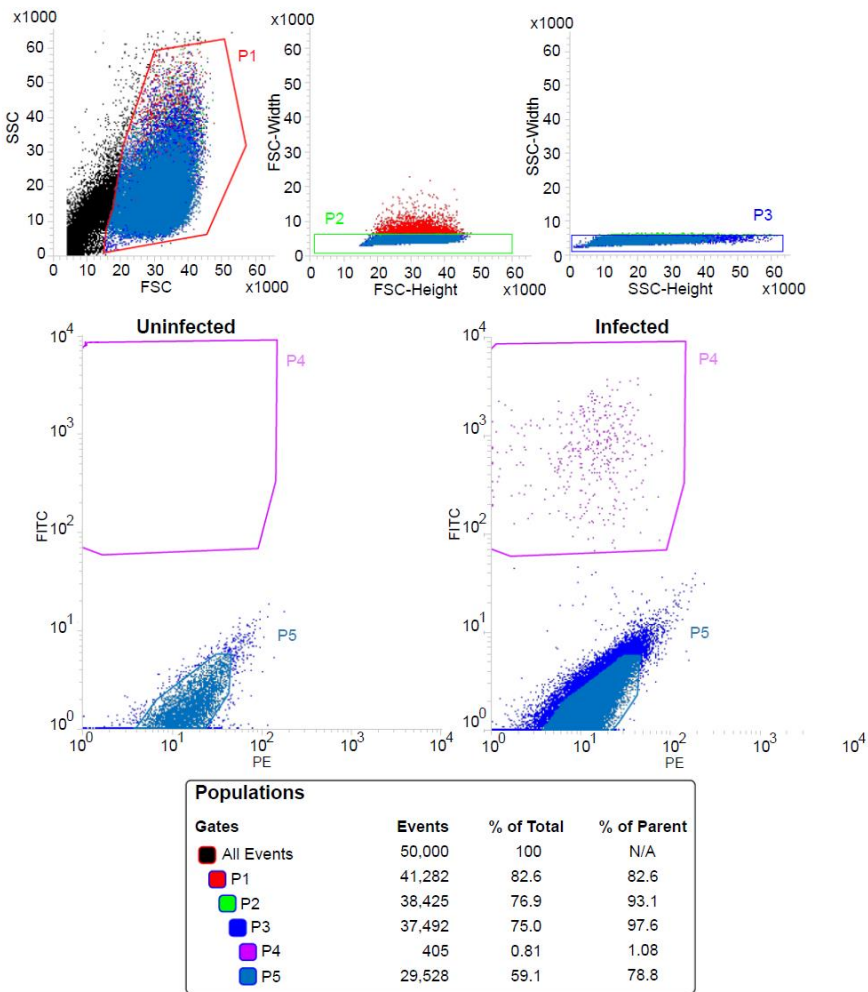

**Supplementary Figure 8: Representative FACS plots illustrating the gating strategy used to obtain *P. berghei* infected hepatocyte cell lines. Gates for P1 (FSC vs SSC), P2 (FSC-Height vs FSC-Width), P3 (SSC-Height vs SSC Width) P4 (GFP positive in FITC**

vs PE) and P5 (GFP negative in FITC vs PE) are indicated, as well as number (out of 50,000 total events) and percentage of events.

## Supplementary Tables

**Supplemental Table 1: RT-PCR primers used in this study.**

| <b>Gene Name</b> | <b>Forward Primer Sequence (5'-&gt;3')</b> | <b>Reverse Primer Sequence (5'-&gt;3')</b>      |
|------------------|--------------------------------------------|-------------------------------------------------|
| MUC13            | ATGGCTGTAACCAGACTGCG                       | CTTGAGACTGGAAGCAACGC                            |
| NEAT1            | AAACGCTGGGAGGGTACAAG                       | ATGCCCAAACCTAGACCTGCC                           |
| SLC22A8          | CTTTGTGCCCTTGGACTTGC                       | GGAAGAGGCAGCTGAAGGAG<br>TTGGAGATCTGTTTTTATGCCGA |
| RASSF9           | GGAAATCCAGACACCCCCAC                       | G                                               |
| B2M              | AAGATGAGTATGCCTGCCGT                       | TGCTTACATGTCTCGATCCCAC                          |

**Supplemental Table 2: Image Acquisition parameters used in Harmony software**

### 3.5 – Operetta.

| <b>Filter</b>   | <b>Excitation (nm)</b> | <b>Emission (nm)</b> | <b>Acquisition time (ms)</b> | <b>Height (µm)</b> |
|-----------------|------------------------|----------------------|------------------------------|--------------------|
| Alexa Fluor 488 | 460-490                | 500-550              | 250                          | -1.5               |
| Alexa Fluor 647 | 620-640                | 650-760              | 200                          | -1.5               |
| Hoechst 3342    | 360-400                | 410-480              | 30                           | -1.5               |
